# Supplementary material for: A Comparison between Crossbred (Holstein × Local Cattle) and Bangladeshi Local Cattle for Body and Milk Quality Traits
Source: MDPI journal article supplement (doi:10.3390/dairy5010012), 2024-02-02
Supplement: s1 [file s1]

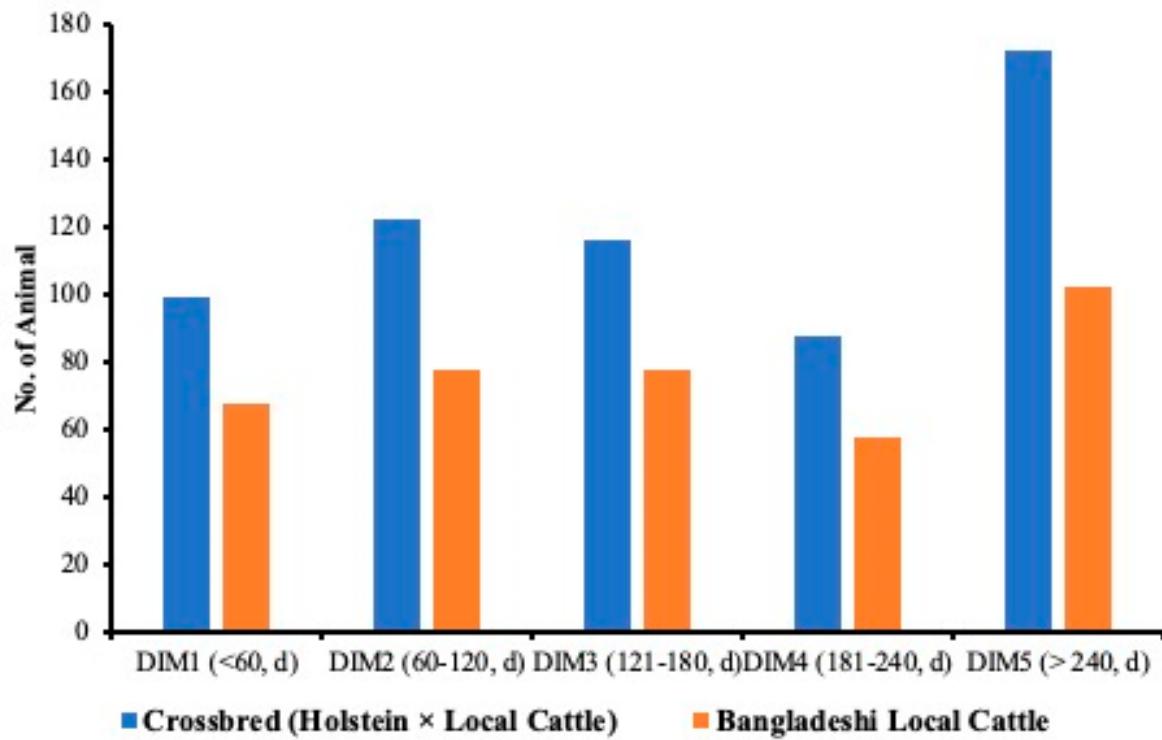

**Figure S1.** Number of animals belongs to crossbred (Holstein x Local Cattle) and Bangladeshi Local Cattle in different classes of days in milk (DIM).
